# Supplementary material
Source: MDPI journal article supplement (https://www.mdpi.com/2071-1050/12/13/5445)
Supplement: s1 [file s1]

## Article

# Nitrogen Deficiency-Dependent Abiotic Stress Enhances Carotenoid Production in Indigenous Green Microalga *Scenedesmus rubescens* KNUA042, for Use as a Potential Resource of High Value Products

Seung-Woo Jo <sup>1,†</sup>, Ji Won Hong <sup>2,†</sup>, Jeong-Mi Do <sup>3,4</sup>, Ho Na <sup>3,4</sup>, Jin-Ju Kim <sup>3</sup>, Seong-Im Park <sup>3,4</sup>, Young-Saeng Kim <sup>5,\*</sup>, Il-Sup Kim <sup>6,\*</sup> and Ho-Sung Yoon <sup>1,3,4,6,\*</sup>

<sup>1</sup> Department of Energy Science, Kyungpook National University, Daegu 41566, Korea; jsw8796@gmail.com

<sup>2</sup> Department of Hydrogen and Renewable Energy, Kyungpook National University, Daegu 41566, Korea; jwhong@knu.ac.kr

<sup>3</sup> Department of Biology, College of Natural Sciences, Kyungpook National University, Daegu 41566, Korea; leciel631@naver.com (J.-M.D.); myrambo10@naver.com (H.N.); deenamon@naver.com (J.-J.K.); sheep91528@naver.com (S.-I.P.)

<sup>4</sup> School of Life Sciences, BK21 Plus KNU Creative BioResearch Group, Kyungpook National University, Daegu 41566, Korea

<sup>5</sup> Research Institute of Ulleung-do and Dok-do, Kyungpook National University, Daegu 41566, Korea; kyslhh1228@hanmail.net

<sup>6</sup> Advanced Bio-resource Research Center, Kyungpook National University, Daegu 41566, Korea; 92kis@hanmail.net

\* Correspondences: kyslhh1228@hanmail.net (Y.-S.K.); 92kis@hanmail.net (I.-S.K.); hsy@knu.ac.kr (H.-S.Y.); Tel.: +82-53-950-5348; Fax: +82-53-951-7398

† These authors contributed equally to this work.

Received: date; Accepted: date; Published: date

**Table S1.** Results from BLAST searches using the sequences of 18S rRNA, ITS2, and *rbcL* genes of strain KNUA042.

| Marker gene | Accession no. | Product size (bp) | Closet match (GenBank accession no.)                         | Overlap (%) | Sequence similarity (%) |
|-------------|---------------|-------------------|--------------------------------------------------------------|-------------|-------------------------|
| 18S rRNA    | MT645779      | 1,767             | <i>Scenedesmus rubescens</i><br>KMMCC 263<br>(JQ315585)      | 99%         | 99.49%                  |
| ITS 2       | MT645778      | 426               | <i>Scenedesmus</i> sp.<br>SM8_2 (KT778097)                   | 100%        | 99.53%                  |
| <i>rbcL</i> | MT655944      | 1,385             | <i>Acutodesmus deserticola</i><br>BCP-YPG-Char<br>(HQ246361) | 94%         | 98.86%                  |

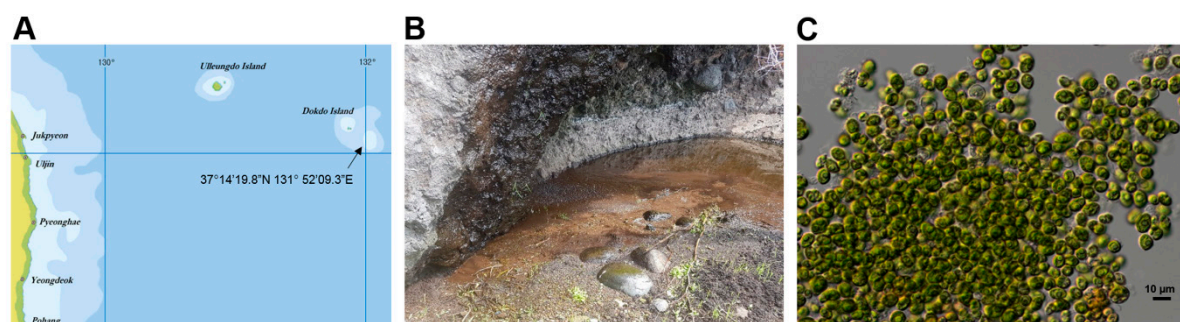

**Figure S1.** (a) Map of the study area, located on the East sea, Korea. (b) Sampling location of *S. rubescens* in the main islands of South Korea. (c) Light microscopy of *S. rubescens* KNUA042.

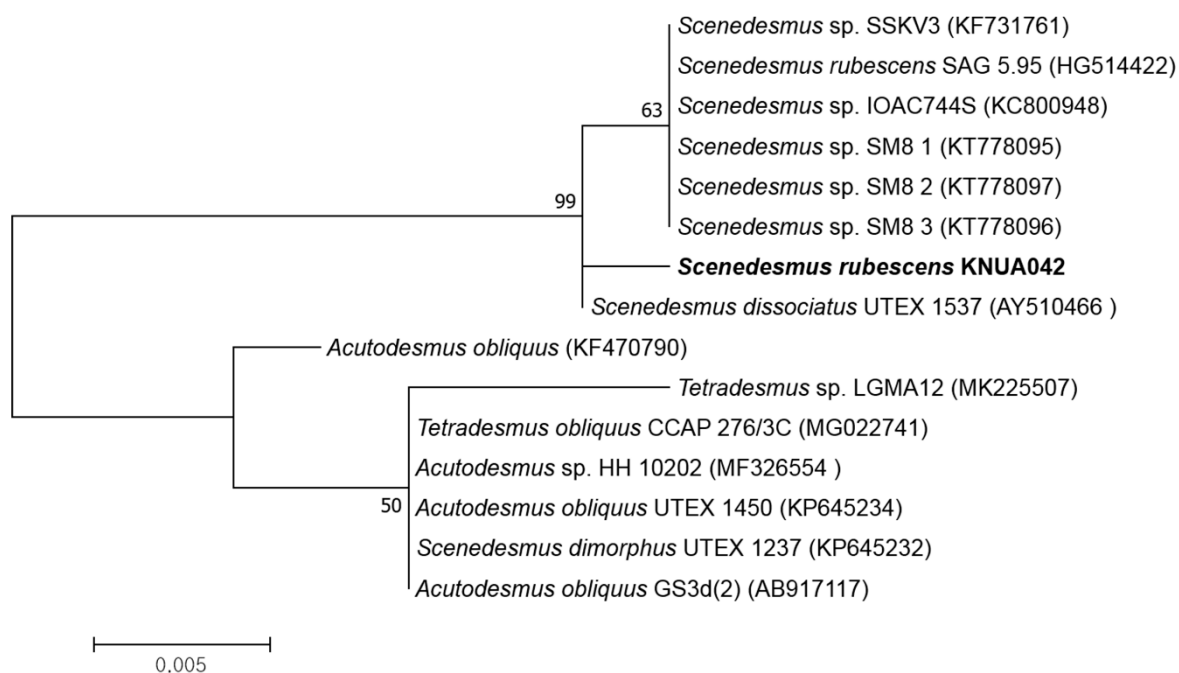

**Figure S2.** Phylogenetic analysis of KNUA042 and its closely related species based on ITS2 region sequences. Numbers in parentheses are accession numbers for each sequence in GenBank. The tree was generated by the ML method using bootstrap values with 1,000 replicates. The scale bar measures the distance between species.

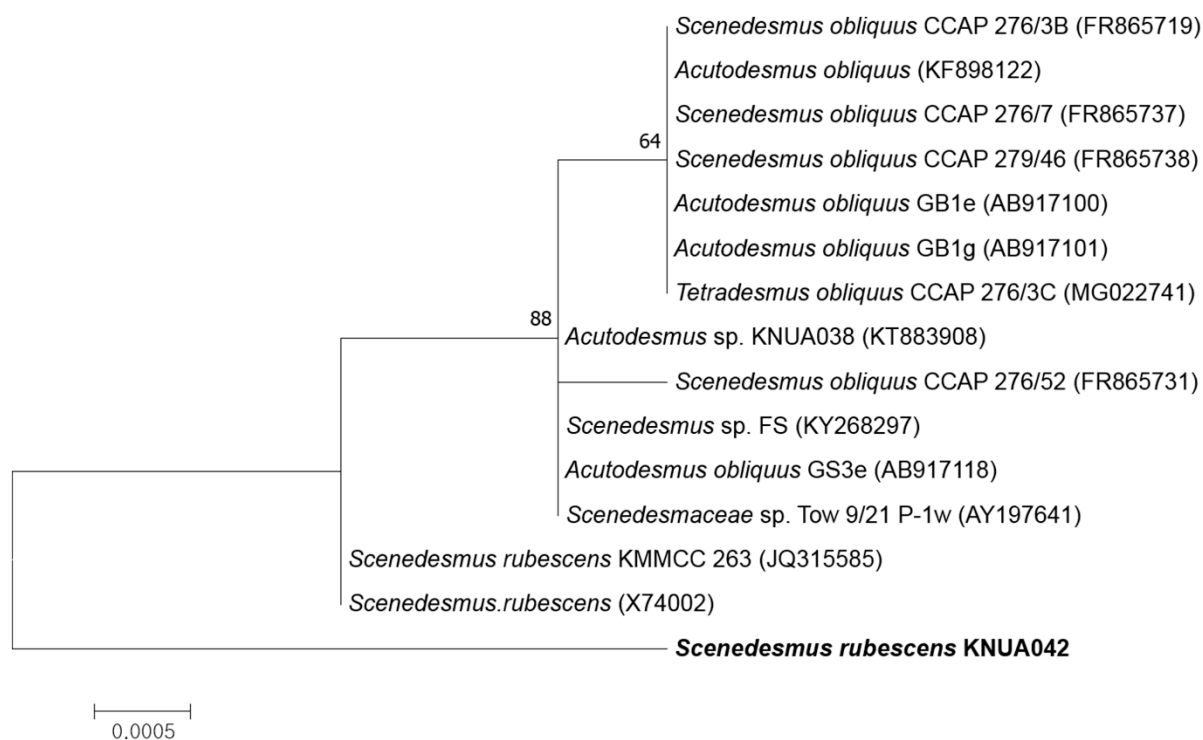

**Figure S3.** Phylogenetic analysis of KNUA042 and closely related species based on 18S rRNA sequences. Numbers in parentheses are accession numbers for each sequence in GenBank. The tree was generated by the ML method using bootstrap values with 1,000 replicates. The scale bar measures the distance between species.

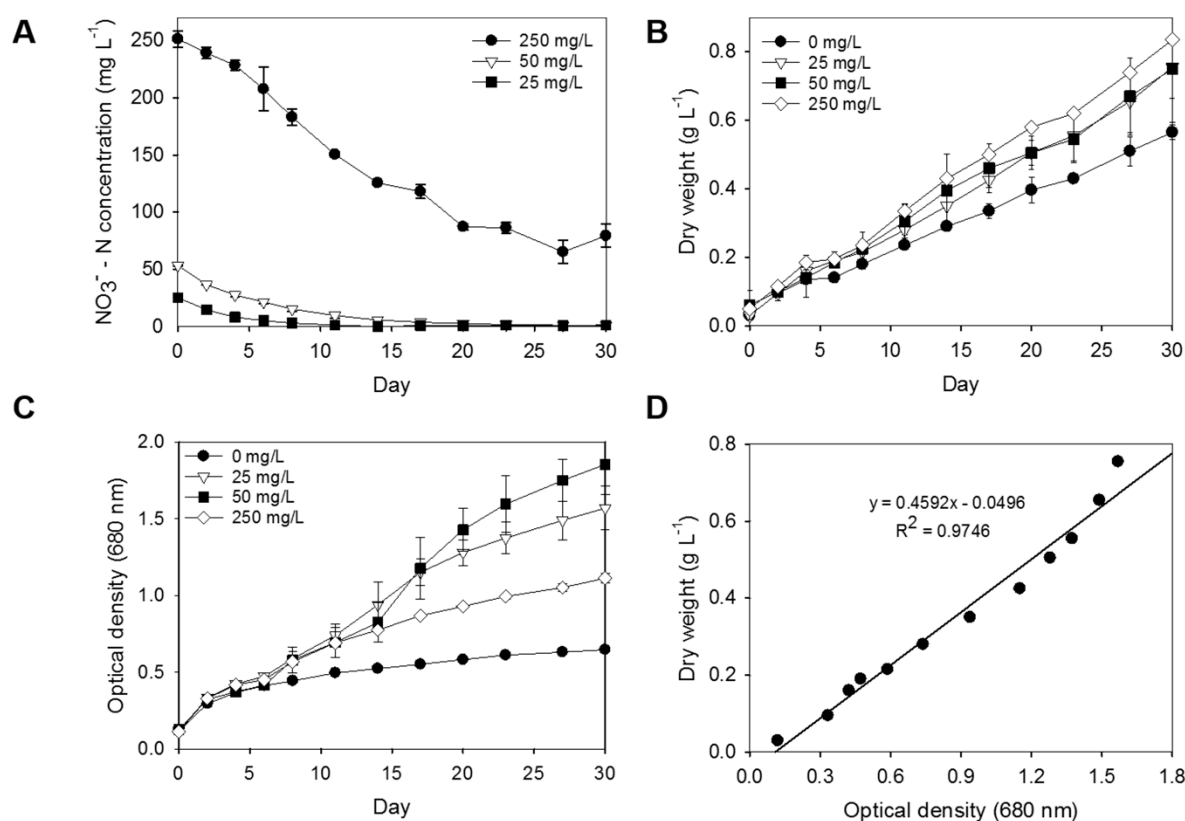

**Figure S4.** (a) Comparison of nitrate-N concentration, (b) dry weight, and (c) optical density from *S. rubescens* KNUA042 cells under different nitrate-N concentrations. (d) Correlation between biomass density and optical density for *S. rubescens* cultivation. The error bar represents the standard deviation (SD) of biological replicates and are shown as mean  $\pm$  SD,  $n = 3$ .

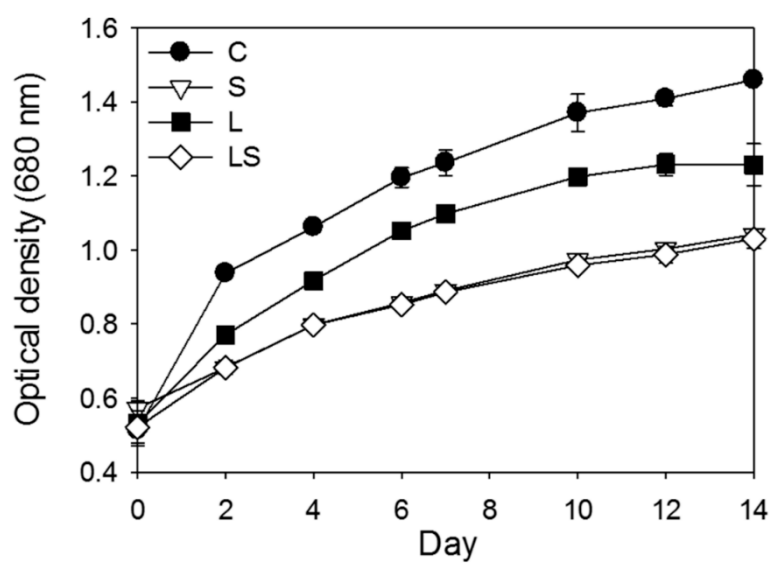

**Figure S5.** Growth rate of *S. rubescens* KNUA042 cells under various stresses from day 0 to day 14. The error bar represents the standard deviation (SD) of biological replicates and are shown as mean  $\pm$  SD,  $n = 3$ .

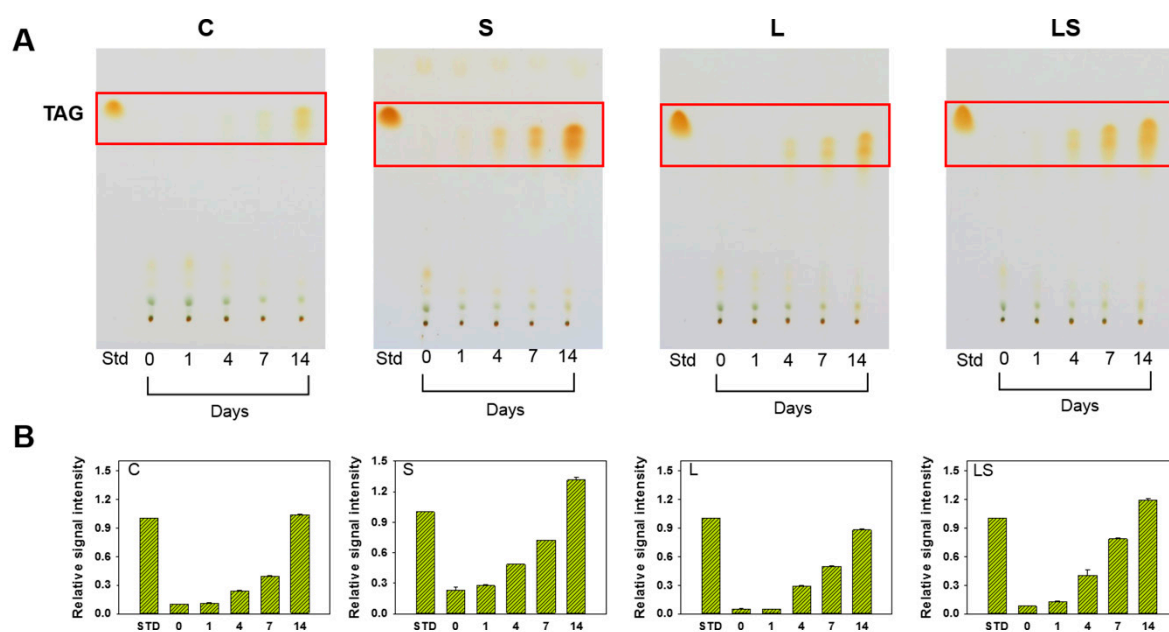

**Figure S6.** (a) Thin layer chromatographic (TLC) analysis of total lipids in *S. rubescens* KNUA042 cells under different stress conditions on day 14 of cultivation. (b) The average relative intensity of TAG with different stress types was determined using ImageJ. The error bar represents the standard deviation (SD) of biological replicates and are shown as mean  $\pm$  SD,  $n = 3$ . TAG, triacylglycerols; Std, glyceryl trioleate.

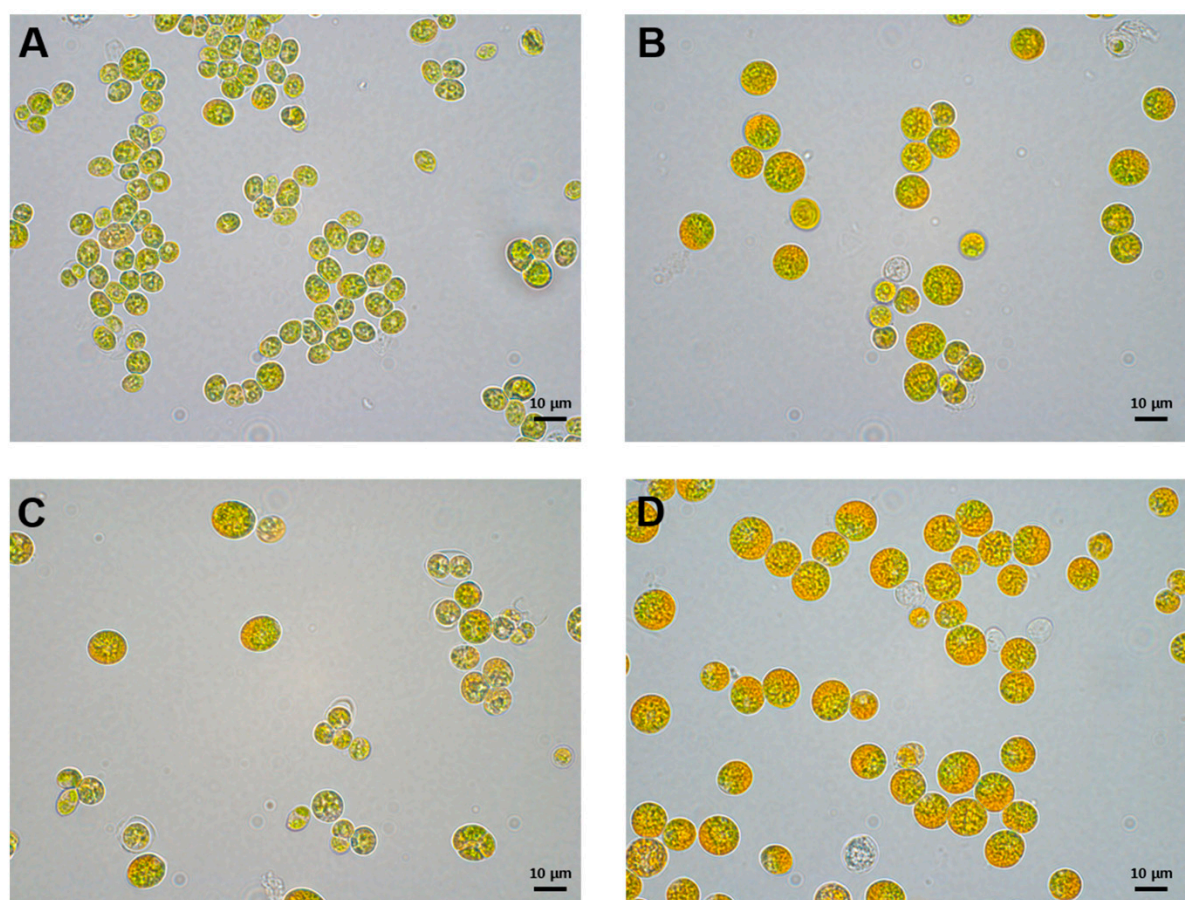

**Figure S7.** Microscopic image of stressed *S. rubescens* KNUA042 cells subjected to (a) nitrogen deficiency, (b) salinity, (c) high light intensity, and (d) combined, high light intensity + salinity) during the final days of cultivation. Scale bar 10  $\mu\text{m}$ .

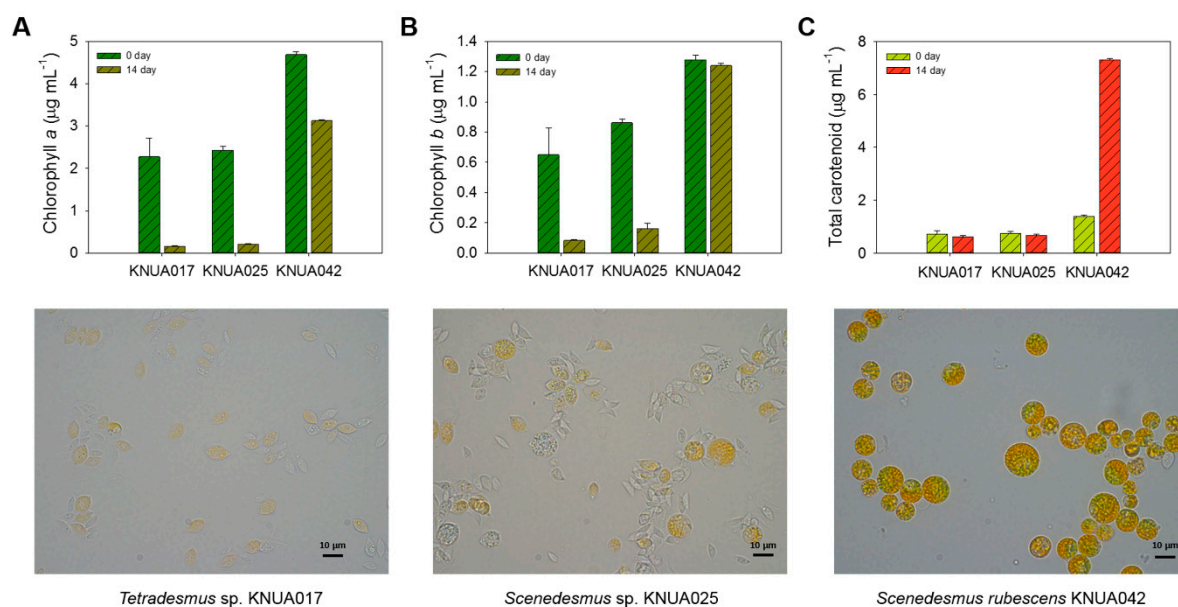

**Figure S8.** Comparison of (a) chlorophyll *a* content, (b) chlorophyll *b*, (c) total carotenoid content in different microalgae strains. The error bar represents the standard deviation (SD) of biological replicates and are shown as mean  $\pm$  SD,  $n = 3$ .

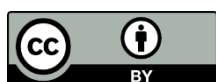

© 2020 by the authors. Submitted for possible open access publication under the terms and conditions of the Creative Commons Attribution (CC BY) license (<http://creativecommons.org/licenses/by/4.0/>).
